# Supplementary material for: Methodology and results of integrated WNV surveillance programmes in Serbia
Source: PubMed Central journal article supplement (PMC5889191; doi:10.1371/journal.pone.0195439), 2018-04-06
Supplement: pone.0195439.s001.pdf [file pone.0195439.s001.pdf]

**S1 Table: Cumulative results of WNV surveillance program in Serbia during 2014, and comparison to the human WNV positive cases reported to the ECDC in 2014**

| Districts (NUTS3)* | Sentinel horses-blood sera for anti-WNV IgG Ab |             |                         | Sentinel chickens-blood sera for anti-WNV IgG Ab |             |                         | Mosquitoes (Culex pipiens) |                |                          | Wild birds (tissues and tracheal swabs) |             |                         | Human cases***      |                |
|--------------------|------------------------------------------------|-------------|-------------------------|--------------------------------------------------|-------------|-------------------------|----------------------------|----------------|--------------------------|-----------------------------------------|-------------|-------------------------|---------------------|----------------|
|                    | Tested                                         | Positive    | First positive reported | Tested                                           | Positive    | First positive reported | Tested pools               | Positive pools | First pos. pool reported | Tested                                  | Positive    | First positive reported | First case reported | Total No cases |
| Central Banat      | 100                                            | 4           | 17/07                   | 255                                              | 46          | 15/06                   | 70                         | 6              | 16/07                    | 23                                      | 0           | -                       | -                   | -              |
| North Bačka        | 118                                            | 4           | 30/08                   | 194                                              | 4           | 28/08                   | 82                         | 6              | 16/07                    | 20                                      | 1           | 29/07                   | -                   | -              |
| North Banat        | 71                                             | 6           | 21/08                   | 88                                               | 9           | 26/08                   | 25                         | 1              | 04/09                    | 9                                       | 0           | -                       | -                   | -              |
| South Bačka        | 130                                            | 5           | 21/07                   | 306                                              | 4           | 08/08                   | 64                         | 1              | 30/07                    | 22                                      | 0           | -                       | 17/07               | 3 (5)          |
| South Banat        | 122                                            | 4           | 29/07                   | 220                                              | 10          | 04/07                   | 75                         | 4              | 30/07                    | 6                                       | 0           | -                       | 29/08               | 16 (19)        |
| Srem               | 95                                             | 8           | 15/07                   | 261                                              | 6           | 29/07                   | 68                         | 1              | 16/07                    | 13                                      | 0           | -                       | 22/08               | 5 (6)          |
| West Bačka         | 110                                            | 2           | 23/08                   | 140                                              | 1           | 23/08                   | 23                         | 3              | 04/09                    | 21                                      | 1           | 21/09                   | -                   | -              |
| City of Belgrade   | 47                                             | 2           | NN**/07                 | 270                                              | 103         | NN**/06                 | 59                         | 0              | -                        | 88                                      | 0           | -                       | 17/07               | 25 (35)        |
| Bor                | 66                                             | 0           | -                       | 120                                              | 0           | -                       | 15                         | 0              | -                        | -                                       | -           | -                       | -                   | -              |
| Braničevo          | 60                                             | 0           | -                       | 250                                              | 1           | 15/06                   | 70                         | 0              | -                        | 65                                      | 0           | -                       | -                   | -              |
| Jablanica          | 88                                             | 0           | -                       | 115                                              | 1           | 24/07                   | 25                         | 0              | -                        | -                                       | -           | -                       | -                   | -              |
| Kolubara           | 12                                             | 0           | -                       | 100                                              | 9           | 21/08                   | 27                         | 0              | -                        | 71                                      | 0           | -                       | 22/08               | 3 (4)          |
| Mačva              | 83                                             | 0           | -                       | 95                                               | 0           | -                       | 42                         | 0              | -                        | 55                                      | 0           | -                       | -                   | -              |
| Moravica           | 86                                             | 0           | -                       | 112                                              | 0           | -                       | 25                         | 0              | -                        | 127                                     | 0           | -                       | -                   | -              |
| Nišava             | 72                                             | 1           | 28/07                   | 120                                              | 0           | -                       | 25                         | 0              | -                        | -                                       | -           | -                       | 17/07               | (1)            |
| Pčinja             | 87                                             | 0           | -                       | 120                                              | 0           | -                       | 25                         | 0              | -                        | -                                       | -           | -                       | -                   | -              |
| Pirot              | 90                                             | 0           | -                       | 120                                              | 1           | 24/07                   | 25                         | 0              | -                        | -                                       | -           | -                       | -                   | -              |
| Podunavlje         | 45                                             | 0           | -                       | 250                                              | 1           | 11/06                   | 70                         | 0              | -                        | 80                                      | 0           | -                       | 29/08               | 3 (4)          |
| Pomoravlje         | 66                                             | 15          | 26/08                   | 90                                               | 1           | 25/08                   | 30                         | 0              | -                        | 98                                      | 0           | -                       | -                   | -              |
| Rasina             | 81                                             | 0           | -                       | 104                                              | 1           | 05/07                   | 30                         | 0              | -                        | 100                                     | 0           | -                       | -                   | -              |
| Raška              | 87                                             | 1           | 20/07                   | 89                                               | 0           | -                       | 30                         | 1              | 30/08                    | 70                                      | 0           | -                       | 10/09               | (1)            |
| Šumadija           | 39                                             | 0           | -                       | 90                                               | 12          | 25/08                   | 20                         | 0              | -                        | -                                       | -           | -                       | 02/10               | 1              |
| Toplica            | 72                                             | 0           | -                       | 110                                              | 9           | 12/07                   | 25                         | 0              | -                        | -                                       | -           | -                       | -                   | -              |
| Zaječar            | 125                                            | 0           | -                       | 120                                              | 0           | -                       | 20                         | 0              | -                        | -                                       | -           | -                       | -                   | -              |
| Zlatibor           | 68                                             | 0           | -                       | 70                                               | 0           | -                       | 25                         | 0              | -                        | -                                       | -           | -                       | -                   | -              |
| <b>25</b>          | <b>2020</b>                                    | <b>52</b>   |                         | <b>3809</b>                                      | <b>219</b>  |                         | <b>995</b>                 | <b>23</b>      |                          | <b>868</b>                              | <b>2</b>    |                         |                     | <b>56 (76)</b> |
| <b>%</b>           |                                                | <b>2.57</b> |                         |                                                  | <b>5.75</b> |                         |                            | <b>2.31</b>    |                          |                                         | <b>0.23</b> |                         |                     |                |

“-” not done and not detected

\* The first seven (7) districts represents the Vojvodina Province (divided by double line from the other districts in Serbia – all presented by alphabetical order)

\*\* The exact day of the first occurrence is not known just the month

\*\*\* Human cases reported to the ECDC (European Centre for Disease Prevention and Control) in 2014: laboratory confirmed cases (clinical cases) – available at:

[http://ecdc.europa.eu/en/healthtopics/west\\_nile\\_fever/West-Nile-fever-maps/Pages/2014-table.aspx](http://ecdc.europa.eu/en/healthtopics/west_nile_fever/West-Nile-fever-maps/Pages/2014-table.aspx)

 - positive results obtained during surveillance that preceded human infections at districts level

 - positive results obtained during surveillance that didn't precede human infections at districts level
