# Supplementary material for: Methodology and results of integrated WNV surveillance programmes in Serbia
Source: PubMed Central journal article supplement (PMC5889191; doi:10.1371/journal.pone.0195439), 2018-04-06
Supplement: pone.0195439.s002.pdf [file pone.0195439.s002.pdf]

**S2 Table: Cumulative results of WNV surveillance program in Serbia during 2015, and comparison to the human WNV positive cases reported to the ECDC in 2015**

| Districts (NUTS3)* | Horses-blood sera for anti-WNV IgM Ab |             |                         | Mosquitoes (Culex pipiens) |                |                          | Wild birds (tissues and tracheal swabs) |             |                         | Human cases***      |                |
|--------------------|---------------------------------------|-------------|-------------------------|----------------------------|----------------|--------------------------|-----------------------------------------|-------------|-------------------------|---------------------|----------------|
|                    | Tested                                | Positive    | First positive reported | Tested pools               | Positive pools | First pos. pool reported | Tested                                  | Positive    | First positive reported | First case reported | Total No cases |
| Central Banat      | 189                                   | 2           | 28/07                   | 70                         | 2              | 10/08                    | 1                                       | 1           | 20/09                   | -                   | -              |
| North Bačka        | 160                                   | 1           | 27/08                   | 71                         | 3              | 10/08                    | 11                                      | 0           | -                       | -                   | -              |
| North Banat        | 120                                   | 4           | 25/08                   | 22                         | 0              | -                        | 5                                       | 0           | -                       | -                   | -              |
| South Bačka        | 186                                   | 1           | 28/09                   | 69                         | 6              | 13/06                    | 8                                       | 1           | 14/08                   | 05/10               | 2              |
| South Banat        | 198                                   | 2           | 28/09                   | 71                         | 4              | 04/08                    | 17                                      | 1           | 08/10                   | 10/08               | 7              |
| Srem               | 140                                   | 0           | -                       | 67                         | 2              | 21/07                    | 11                                      | 0           | -                       | 05/10               | 1              |
| West Bačka         | 234                                   | 2           | 28/08                   | 68                         | 3              | 30/08                    | 18                                      | 3           | 23/08                   | -                   | -              |
| City of Belgrade   | 141                                   | 4           | NN**/06                 | 40                         | 0              | -                        | 93                                      | 2           | NN**/10                 | 14/09               | 15             |
| Bor                | 108                                   | 0           | -                       | 20                         | 0              | -                        | 0                                       | 0           | -                       | -                   | -              |
| Braničevo          | 84                                    | 0           | -                       | 25                         | 0              | -                        | 0                                       | 0           | -                       | -                   | -              |
| Jablanica          | 120                                   | 0           | -                       | 20                         | 0              | -                        | 0                                       | 0           | -                       | -                   | -              |
| Kolubara           | 148                                   | 0           | -                       | 15                         | 0              | -                        | 200                                     | 0           | -                       | 02/11               | 1              |
| Mačva              | 87                                    | 1           | 09/09                   | 9                          | 0              | -                        | 53                                      | 0           | -                       | 02/11               | 1              |
| Moravica           | 123                                   | 0           | -                       | 20                         | 0              | -                        | 0                                       | 0           | -                       | -                   | -              |
| Nišava             | 120                                   | 0           | -                       | 20                         | 0              | -                        | 0                                       | 0           | -                       | -                   | -              |
| Pčinja             | 120                                   | 0           | -                       | 19                         | 0              | -                        | 0                                       | 0           | -                       | 05/10               | 1              |
| Pirot              | 120                                   | 0           | -                       | 20                         | 0              | -                        | 0                                       | 0           | -                       | -                   | -              |
| Podunavlje         | 97                                    | 0           | -                       | 70                         | 0              | -                        | 82                                      | 0           | -                       | -                   | -              |
| Pomoravlje         | 118                                   | 0           | -                       | 20                         | 0              | -                        | 3                                       | 0           | -                       | -                   | -              |
| Rasina             | 75                                    | 0           | -                       | 20                         | 0              | -                        | 0                                       | 0           | -                       | -                   | -              |
| Raška              | 91                                    | 0           | -                       | 70                         | 0              | -                        | 110                                     | 0           | -                       | -                   | -              |
| Šumadija           | 135                                   | 0           | -                       | 70                         | 0              | -                        | 107                                     | 0           | -                       | -                   | -              |
| Toplica            | 120                                   | 0           | -                       | 20                         | 0              | -                        | 0                                       | 0           | -                       | -                   | -              |
| Zaječar            | 102                                   | 0           | -                       | 20                         | 0              | -                        | 1                                       | 0           | -                       | -                   | -              |
| Zlatibor           | 102                                   | 0           | -                       | 20                         | 0              | -                        | 0                                       | 0           | -                       | -                   | -              |
| <b>25</b>          | <b>3238</b>                           | <b>17</b>   |                         | <b>956</b>                 | <b>20</b>      |                          | <b>720</b>                              | <b>8</b>    |                         |                     | <b>28</b>      |
| <b>%</b>           |                                       | <b>0.53</b> |                         |                            | <b>2.09</b>    |                          |                                         | <b>1.11</b> |                         |                     |                |

“-“ not done and not detected

\* The first seven (7) districts represents the Vojvodina Province (divided by double line from the other districts in Serbia – all presented by alphabetical order)

\*\* The exact day of the first occurrence is not known just the month

\*\*\* Human cases reported to the ECDC in 2015: laboratory confirmed cases (clinical cases) – available at: <https://ecdc.europa.eu/en/table-cases-2015>

 - positive results obtained during surveillance that preceded human infections at districts level

 - human infections at the district level where no previous positive findings were obtained during surveillance
