# Supplementary material for: Methodology and results of integrated WNV surveillance programmes in Serbia
Source: PubMed Central journal article supplement (PMC5889191; doi:10.1371/journal.pone.0195439), 2018-04-06
Supplement: pone.0195439.s003.pdf [file pone.0195439.s003.pdf]

S3 Table: Description of the sampling locations: Districts names, geographic coordinates and web links

| Districts (NUTS3)* |                        | Geographic coordinates<br>(the center of the district)                                                                | Web links for basic description of the Districts                                                                              |
|--------------------|------------------------|-----------------------------------------------------------------------------------------------------------------------|-------------------------------------------------------------------------------------------------------------------------------|
| Vojvodina Province | Central Banat          | 45.4788° N, 20.6083° E                                                                                                | <a href="https://en.wikipedia.org/wiki/Central_Banat_District">https://en.wikipedia.org/wiki/Central_Banat_District</a>       |
|                    | North Bačka            | 45.9803° N, 19.5907° E                                                                                                | <a href="https://en.wikipedia.org/wiki/North_Ba%C4%8Dka_District">https://en.wikipedia.org/wiki/North_Ba%C4%8Dka_District</a> |
|                    | North Banat            | 45.9068° N, 19.9993° E                                                                                                | <a href="https://en.wikipedia.org/wiki/North_Banat_District">https://en.wikipedia.org/wiki/North_Banat_District</a>           |
|                    | South Bačka            | 45.4890° N, 19.6976° E                                                                                                | <a href="https://en.wikipedia.org/wiki/South_Ba%C4%8Dka_District">https://en.wikipedia.org/wiki/South_Ba%C4%8Dka_District</a> |
|                    | South Banat            | 45.0027° N, 21.0543° E                                                                                                | <a href="https://en.wikipedia.org/wiki/South_Banat_District">https://en.wikipedia.org/wiki/South_Banat_District</a>           |
|                    | Srem                   | 45.0029° N, 19.8014° E                                                                                                | <a href="https://en.wikipedia.org/wiki/Srem_District">https://en.wikipedia.org/wiki/Srem_District</a>                         |
|                    | West Bačka             | 45.7355° N, 19.1897° E                                                                                                | <a href="https://en.wikipedia.org/wiki/West_Ba%C4%8Dka_District">https://en.wikipedia.org/wiki/West_Ba%C4%8Dka_District</a>   |
| Central Serbia     | City of Belgrade       | 44.5850° N, 20.3964° E                                                                                                | <a href="https://en.wikipedia.org/wiki/Belgrade">https://en.wikipedia.org/wiki/Belgrade</a>                                   |
|                    | Bor                    | 44.3702° N, 22.2857° E                                                                                                | <a href="https://en.wikipedia.org/wiki/Bor_District">https://en.wikipedia.org/wiki/Bor_District</a>                           |
|                    | Braničevo              | 44.5298° N, 21.4910° E                                                                                                | <a href="https://en.wikipedia.org/wiki/Brani%C4%8Devo_District">https://en.wikipedia.org/wiki/Brani%C4%8Devo_District</a>     |
|                    | Jablanica              | 42.9482° N, 21.8129° E                                                                                                | <a href="https://en.wikipedia.org/wiki/Jablanica_District">https://en.wikipedia.org/wiki/Jablanica_District</a>               |
|                    | Kolubara               | 44.3510° N, 20.0004° E                                                                                                | <a href="https://en.wikipedia.org/wiki/Kolubara_District">https://en.wikipedia.org/wiki/Kolubara_District</a>                 |
|                    | Mačva                  | 44.5925° N, 19.5082° E                                                                                                | <a href="https://en.wikipedia.org/wiki/Ma%C4%8Dva_District">https://en.wikipedia.org/wiki/Ma%C4%8Dva_District</a>             |
|                    | Moravica               | 43.8415° N, 20.2905° E                                                                                                | <a href="https://en.wikipedia.org/wiki/Moravica_District">https://en.wikipedia.org/wiki/Moravica_District</a>                 |
|                    | Nišava                 | 43.3739° N, 21.9322° E                                                                                                | <a href="https://en.wikipedia.org/wiki/Ni%C5%A1ava_District">https://en.wikipedia.org/wiki/Ni%C5%A1ava_District</a>           |
|                    | Pčinja                 | 42.5836° N, 22.1430° E                                                                                                | <a href="https://en.wikipedia.org/wiki/P%C4%8Dinja_District">https://en.wikipedia.org/wiki/P%C4%8Dinja_District</a>           |
|                    | Pirot                  | 43.0874° N, 22.5983° E                                                                                                | <a href="https://en.wikipedia.org/wiki/Pirot_District">https://en.wikipedia.org/wiki/Pirot_District</a>                       |
|                    | Podunavlje             | 44.4729° N, 20.9901° E                                                                                                | <a href="https://en.wikipedia.org/wiki/Podunavlje_District">https://en.wikipedia.org/wiki/Podunavlje_District</a>             |
|                    | Pomoravlje             | 43.9591° N, 21.2714° E                                                                                                | <a href="https://en.wikipedia.org/wiki/Pomoravlje_District">https://en.wikipedia.org/wiki/Pomoravlje_District</a>             |
|                    | Rasina                 | 43.5264° N, 21.1588° E                                                                                                | <a href="https://en.wikipedia.org/wiki/Rasina_District">https://en.wikipedia.org/wiki/Rasina_District</a>                     |
|                    | Raška                  | 43.3373° N, 20.5734° E                                                                                                | <a href="https://en.wikipedia.org/wiki/Ra%C5%A1ka_District">https://en.wikipedia.org/wiki/Ra%C5%A1ka_District</a>             |
|                    | Šumadija               | 44.2051° N, 20.7857° E                                                                                                | <a href="https://en.wikipedia.org/wiki/%C5%A0umadija_District">https://en.wikipedia.org/wiki/%C5%A0umadija_District</a>       |
| Toplica            | 43.1907° N, 21.3408° E | <a href="https://en.wikipedia.org/wiki/Toplica_District">https://en.wikipedia.org/wiki/Toplica_District</a>           |                                                                                                                               |
| Zaječar            | 43.8039° N, 22.0538° E | <a href="https://en.wikipedia.org/wiki/Zaje%C4%8Dar_District">https://en.wikipedia.org/wiki/Zaje%C4%8Dar_District</a> |                                                                                                                               |
| Zlatibor           | 43.6454° N, 19.7101° E | <a href="https://en.wikipedia.org/wiki/Zlatibor_District">https://en.wikipedia.org/wiki/Zlatibor_District</a>         |                                                                                                                               |
