# Supplementary material for: Methodology and results of integrated WNV surveillance programmes in Serbia
Source: PubMed Central journal article supplement (PMC5889191; doi:10.1371/journal.pone.0195439), 2018-04-06
Supplement: pone.0195439.s004.pdf [file pone.0195439.s004.pdf]

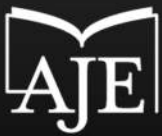

# EDITORIAL CERTIFICATE

This document certifies that the manuscript listed below was edited for proper English language, grammar, punctuation, spelling, and overall style by one or more of the highly qualified native English speaking editors at American Journal Experts.

## Manuscript title:

Methodology and results of integrated WNV surveillance programs in Serbia

## Authors:

Tamaš Petrović, Milanko Šekler, Dušan Petrić, Sava Lazić, Zoran Debeljak, Dejan Vidanović, Aleksandra Ignjatović Čupina, Gospava Lazić, Diana Lupulović, Mišo Kolarević, Budimir Plavšić

## Date Issued:

November 28, 2017

## Certificate Verification Key:

1D10-8BED-C68D-AF1D-011E

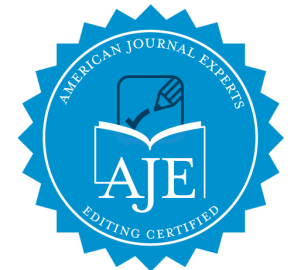

This certificate may be verified at [www.aje.com/certificate](http://www.aje.com/certificate). This document certifies that the manuscript listed above was edited for proper English language, grammar, punctuation, spelling, and overall style by one or more of the highly qualified native English speaking editors at American Journal Experts. Neither the research content nor the authors' intentions were altered in any way during the editing process. Documents receiving this certification should be English-ready for publication; however, the author has the ability to accept or reject our suggestions and changes. To verify the final AJE edited version, please visit our verification page. If you have any questions or concerns about this edited document, please contact American Journal Experts at [support@aje.com](mailto:support@aje.com).
